# Supplementary material for: New strategy of light quality regulation with leaf-spraying fluorescent coatings for enhancing photosynthesis efficiency
Source: Royal Society of Chemistry journal article supplement (doi:10.1039/d1ra03695e), 2021-01-01
Supplement: d1ra03695e1.pdf [file d1ra03695e1.pdf]

## **Electronic Supplementary Information (ESI)**

### **New strategy of light quality regulation with leaf-spraying fluorescent coatings for enhancing photosynthesis efficiency**

Yankai Liu,<sup>a</sup> Shuai Zhang,<sup>\*b</sup> Fei Yang,<sup>a</sup> Guanzhu Wang,<sup>a</sup> Xiuli Jing,<sup>a</sup> Xiaofei Wang<sup>a</sup> and Chunxiang You<sup>a\*</sup>

<sup>a</sup> National Key Laboratory of Crop Biology, Shandong Collaborative Innovation Center of Fruit & Vegetable Quality and Efficient Production, College of Horticulture Science and Engineering, Shandong Agricultural University, Tai-An, Shandong 271018, China. Email: youchunxiang@126.com

<sup>b</sup> College of Chemistry and Material Science, Shandong Agricultural University, Tai-An, Shandong, 271018, China. Email: hyzs@sdau.edu.cn

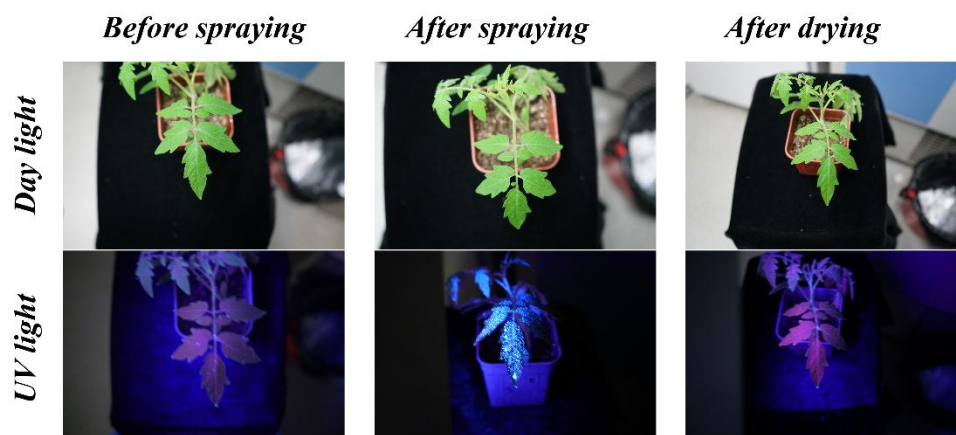

**Fig. S1** Images of tomato seedlings under day light (top) and UV light (bottom) before or after spraying DETA-CD nanomaterial (40 mg/L, 0.2 mL).

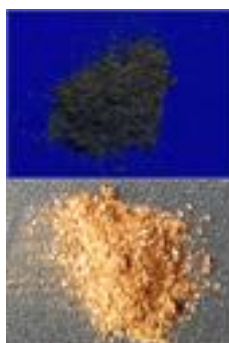

**Fig. S2** Photographic images of coating powder through the polymerization of TA with DETA-CD under UV light of 365 nm (top) and daylight (bottom). The copolymerization between DETA-CD and TA resulted in the disappearance of fluorescence capacity.

U-CDs

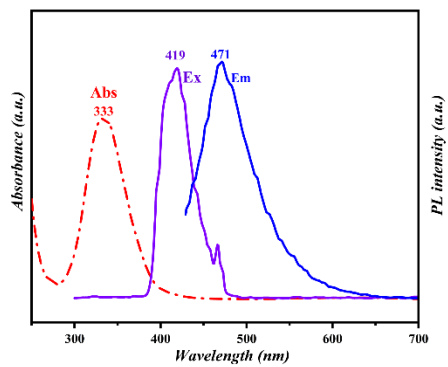

EDA-CDs

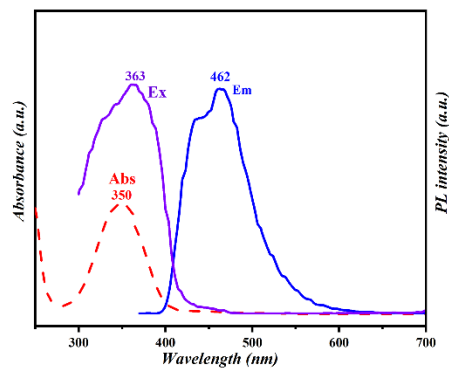

DETA-CDs

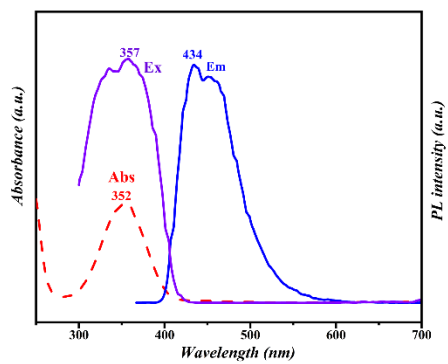

TEPA-CDs

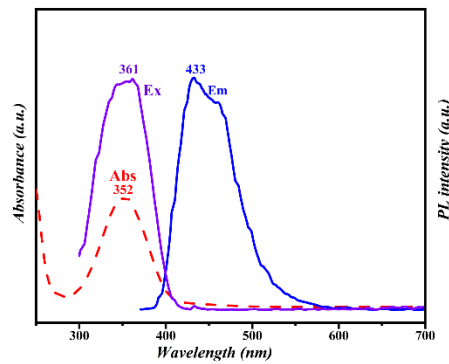

600-CDs

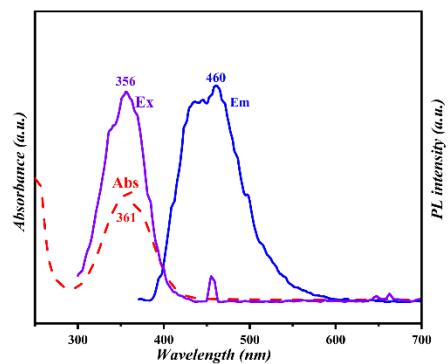

**Fig. S3** UV-Vis and fluorescence spectra of U-CDs, EDA-CDs, DETA-CDs, TEPA-CDs, 600-CDs.

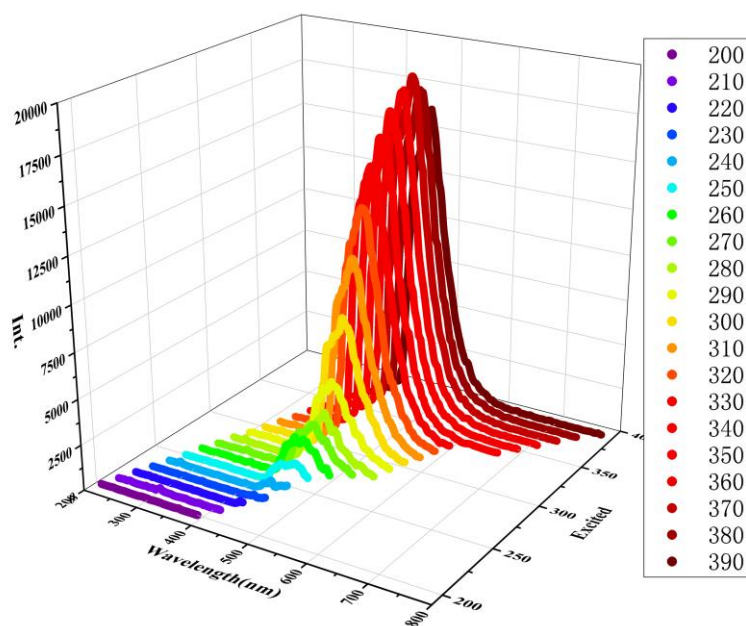

**Fig. S4** Fluorescent behavior of 1800-CDs under different UV light radiation.

**1800-CD:**

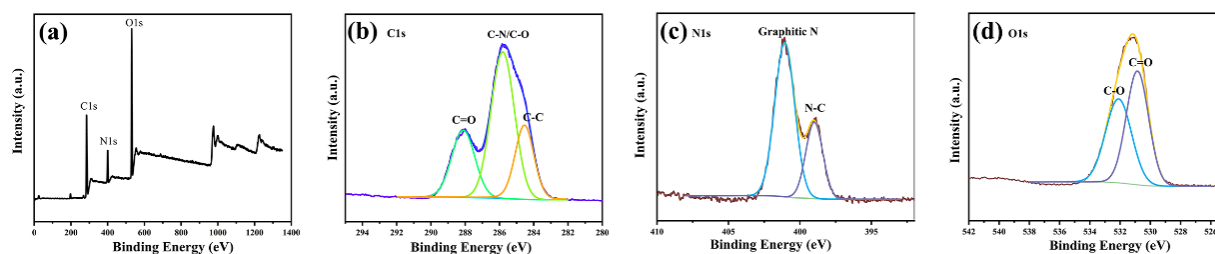

**TA:**

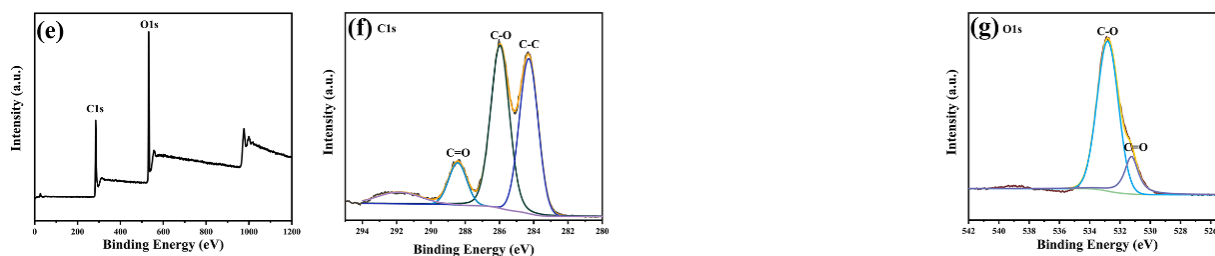

**FPC:**

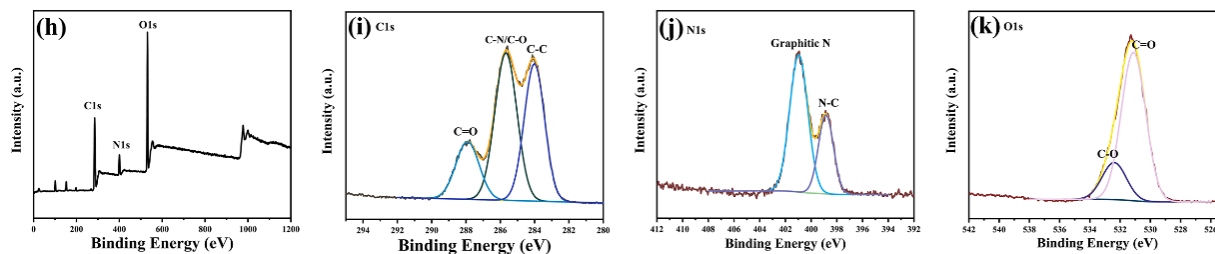

**Fig. S5** XPS characterizations of 1800-CD, tannic acid and FPCs.

The high-resolution XPS spectra of 1800-CDs contained two N 1s peaks at 400.0 and 401.1 eV, which corresponded to amino N (C-N) and graphitic N, respectively.

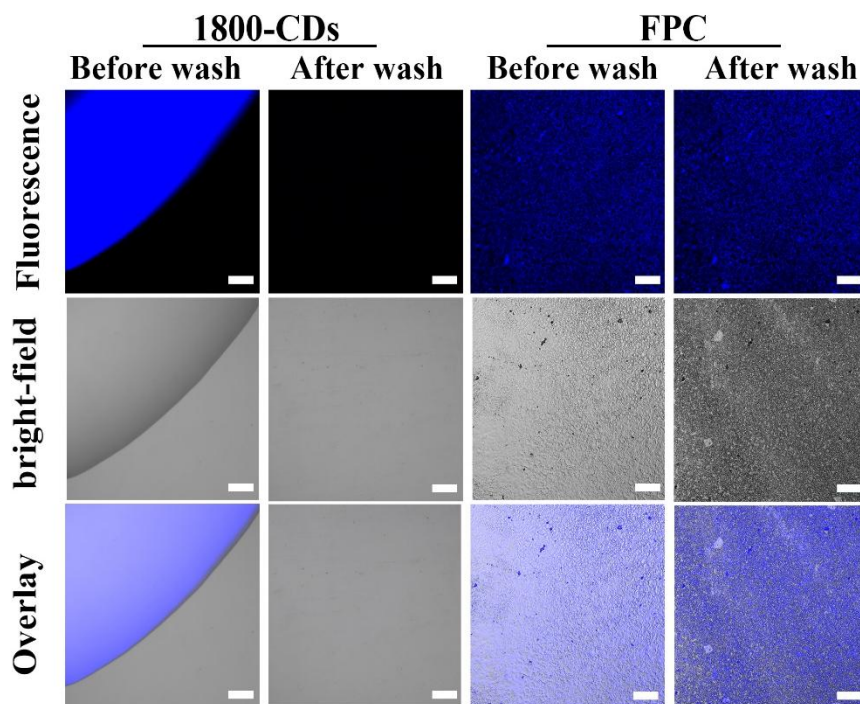

**Fig. S6** Confocal microscopy image of FPCs on the smooth glass surface before and after washing (scale bar: 100  $\mu\text{m}$ ).

**Video S1** Washing-out resistance of FPC on leaves under simulated rain erosion (For more details, see the Supplementary Video S1)
